# Supplementary material for: Synthesis and characterisation of macrocyclic palladium(ii)–sodium(i) complexes: generation of an unusual metal-mediated electron delocalisation
Source: Royal Society of Chemistry journal article supplement (doi:10.1039/b402507e), 2004-01-01
Supplement: b402507e.doc [file b402507e.doc]

**Electronic Supplementary Information**

for

**Synthesis and characterisation of macrocyclic palladium(II)-sodium(I) complexes: generation of an unusual metal-mediated electron delocalisation**

Il Yoon,*a* Midori Goto,*a* Toshimi Shimizu,*a* Shim Sung Lee*b* and Masumi Asakawa**a*

*a* *Nanoarchitectonics Research Center, National Institute of Advanced Industrial Science and Technology, Tsukuba Central 5, 1-1-1 Higashi, Tsukuba Ibaraki 305-8565, Japan*

*E-mail: masumi-asakawa@aist.go.jp*

*b Department of Chemistry and Research Institute of Natural Sciences, Gyeongsang National University, Chinju 660-701, S. Korea*

Scheme S1 Synthetic procedures of **1**.

Synthesis of [Ba**L**H2(ClO4)2]: To a refluxing solution of barium perchlorate (336.6 mg, 1.0 mmol) in dry methanol (100mL), a solution of dialdehyde crown ether derivativeS1 (526.1 mg, 1.0 mmol) and 1,2-phenylenediamine (107.7 mg, 1.0 mmol) in dry THF (12 mL) was added over an hour. The mixture was heated under reflux for an additional 12 h. After the mixture cooled to ambient temperature, the solution was concentrated to 30 mL, and 100mL of petroleum ether was added, an orange solid precipitated out. The solid was filtered off, washed with petroleum ether, and dried to afford barium perchlorate-crown ether macrocycle complex as an orange solid (920.2mg, yield 99%). 1H NMR (400 MHz, CD3CN, 298K): *δ* = 14.86 (2 H, s, OH), 8.77 (2 H, s, CH=N), 7.64-7.54 (4 H, m, ArH), 7.27-7.23 (4 H, m, ArH), 6.86 (2 H, t, *J* = 8 Hz, ArH), 6.61-6.59 (4 H, m, ArH), 4.50 (4 H, t, *J* = 5 Hz, CH2OAr), 4.01-3.95 (12H, m, CH2CH2OCH2); 13C{1H} NMR (150 MHz, CD3CN, 298K): *δ* = 162.4, 159.1, 146.8, 146.5, 135.9, 128.8, 126.7, 122.5, 119.9, 119.0, 117.4, 113.5, 69.0, 68.5, 67.7, 67.4; FAB MS: m/z 834 ((M – 1)+ – ClO4, 47), 368 (M2+ – 2ClO4, 15%); IR (KBr, cm-1): 3422m, 2927m, 2361s, 2331s, 1733s, 1699s, 1652s, 1617s, 1506s, 1456s, 1256s, 1071vs (ClO4-), 744m; Found: C, 40.86; H, 3.69; N, 2.52. Calc. for C34H34BaCl2N2O16∙3H2O: C, 41.29; H, 4.08; N, 2.83%.

Crystal data for [Ba**L**H2(ClO4)2]: [Ba(C34H34N2O8)(ClO4)2]∙1.5H2O: C34H37BaCl2N2O17.5, *M* = 961.90, monoclinic, space group *C*2/c, *a* = 27.358(8), *b* = 16.207(5), *c* = 23.224(7) Å, *β* = 125.657(5) º, *V* = 8367(4) Å3, *Z* = 8, *D*c = 1.527 g cm-3, *F*(000) = 3880, *μ*(Mo-Kα) = 11.50 cm-1, *T* = 298(2) K, 26395 reflections measured, 9832 unique (*R*int = 0.1673), *R*1 = 0.0918 (I > 2 *σ*(I)), *wR*2 = 0.2800 (all data). CCDC reference number 234289.

Ref S1 M. Narita, M. Asakawa and T. Shimizu, unpublished work.


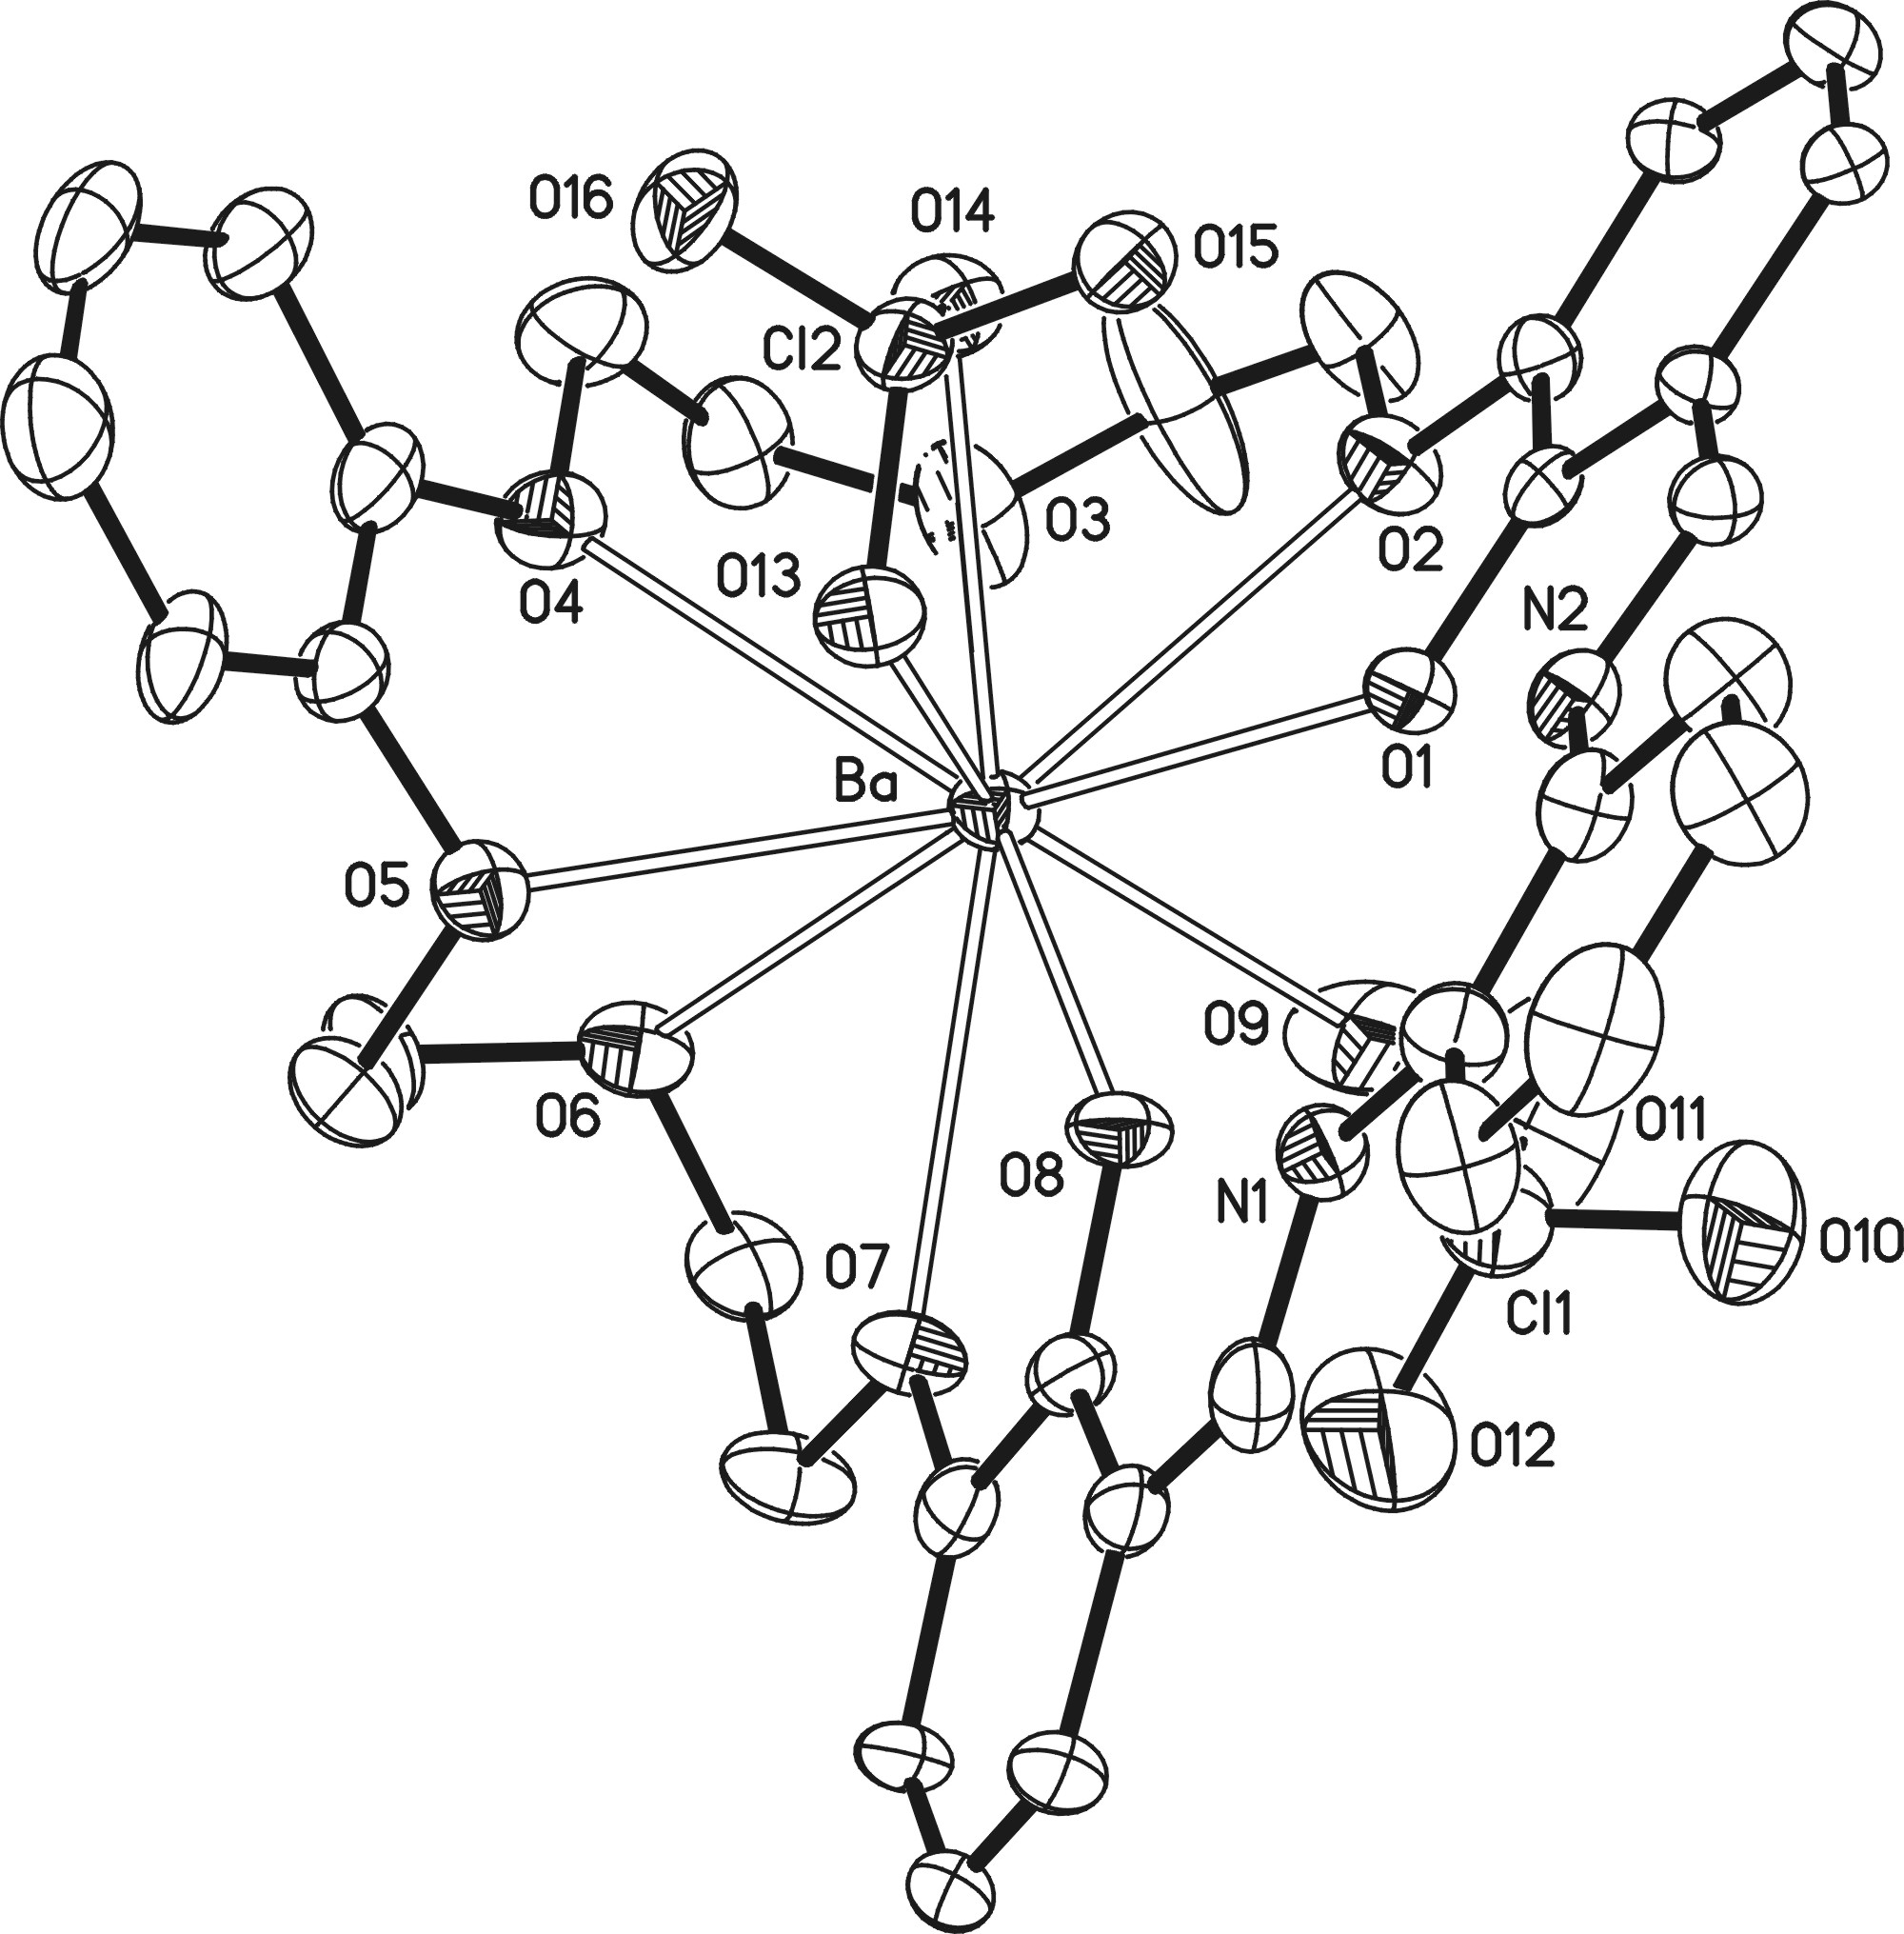


Fig. S1 Molecular structures of [Ba**L**H2(ClO4)2]. Ellipsoids are drawn at the 30 % probability level. Hydrogen atoms and water molecules are not shown for clarity.

Synthesis of **1**: To a stirred solution of barium perchlorate-crown ether macrocycle complex (0.90 g, 0.96 mmol) in acetonitrile (50 mL), a solution of Na2SO4 (0.90 g, 6.3 mmol) in water (1 mL) was added. The mixture was then stirred for 12h at room temperature. Then the reaction mixture was filtered to remove the barium sulfate precipitate. The filtrate dried over anhydrous Na2SO4. After removal of the solvent, the residue was dried under high vacuum to yield **1** as a red solid (0.77 g, 95%).


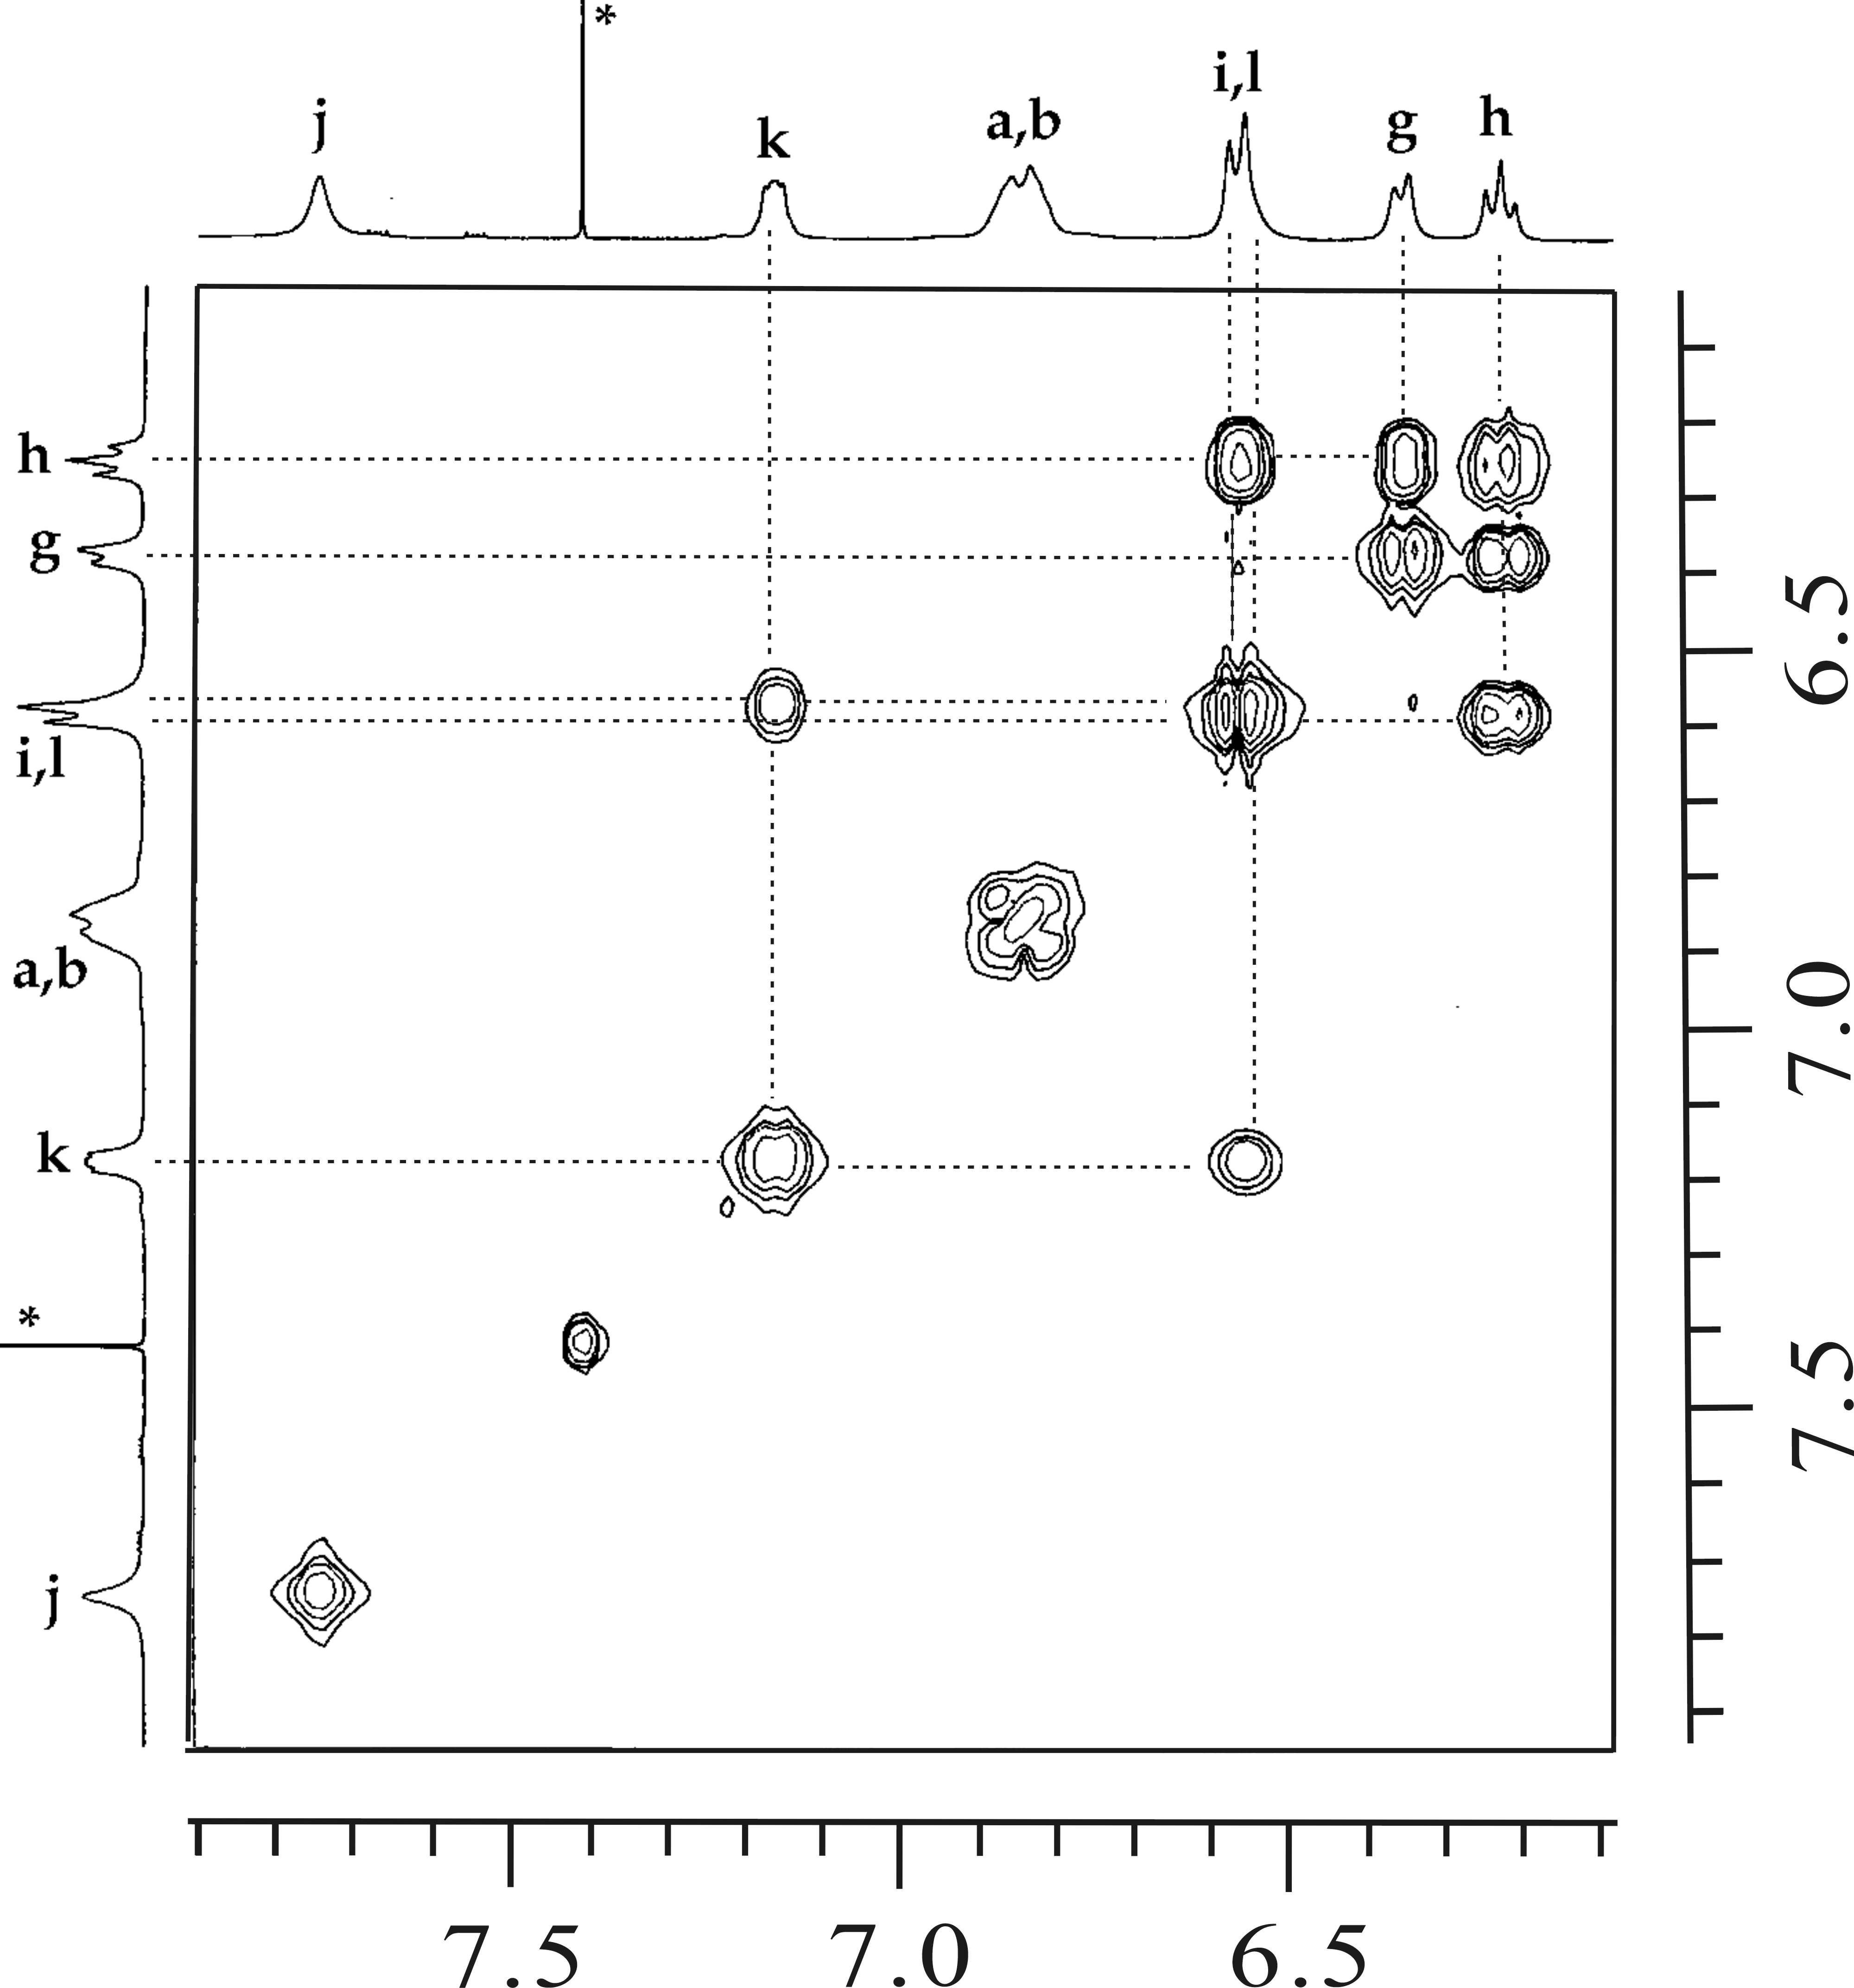


(a)


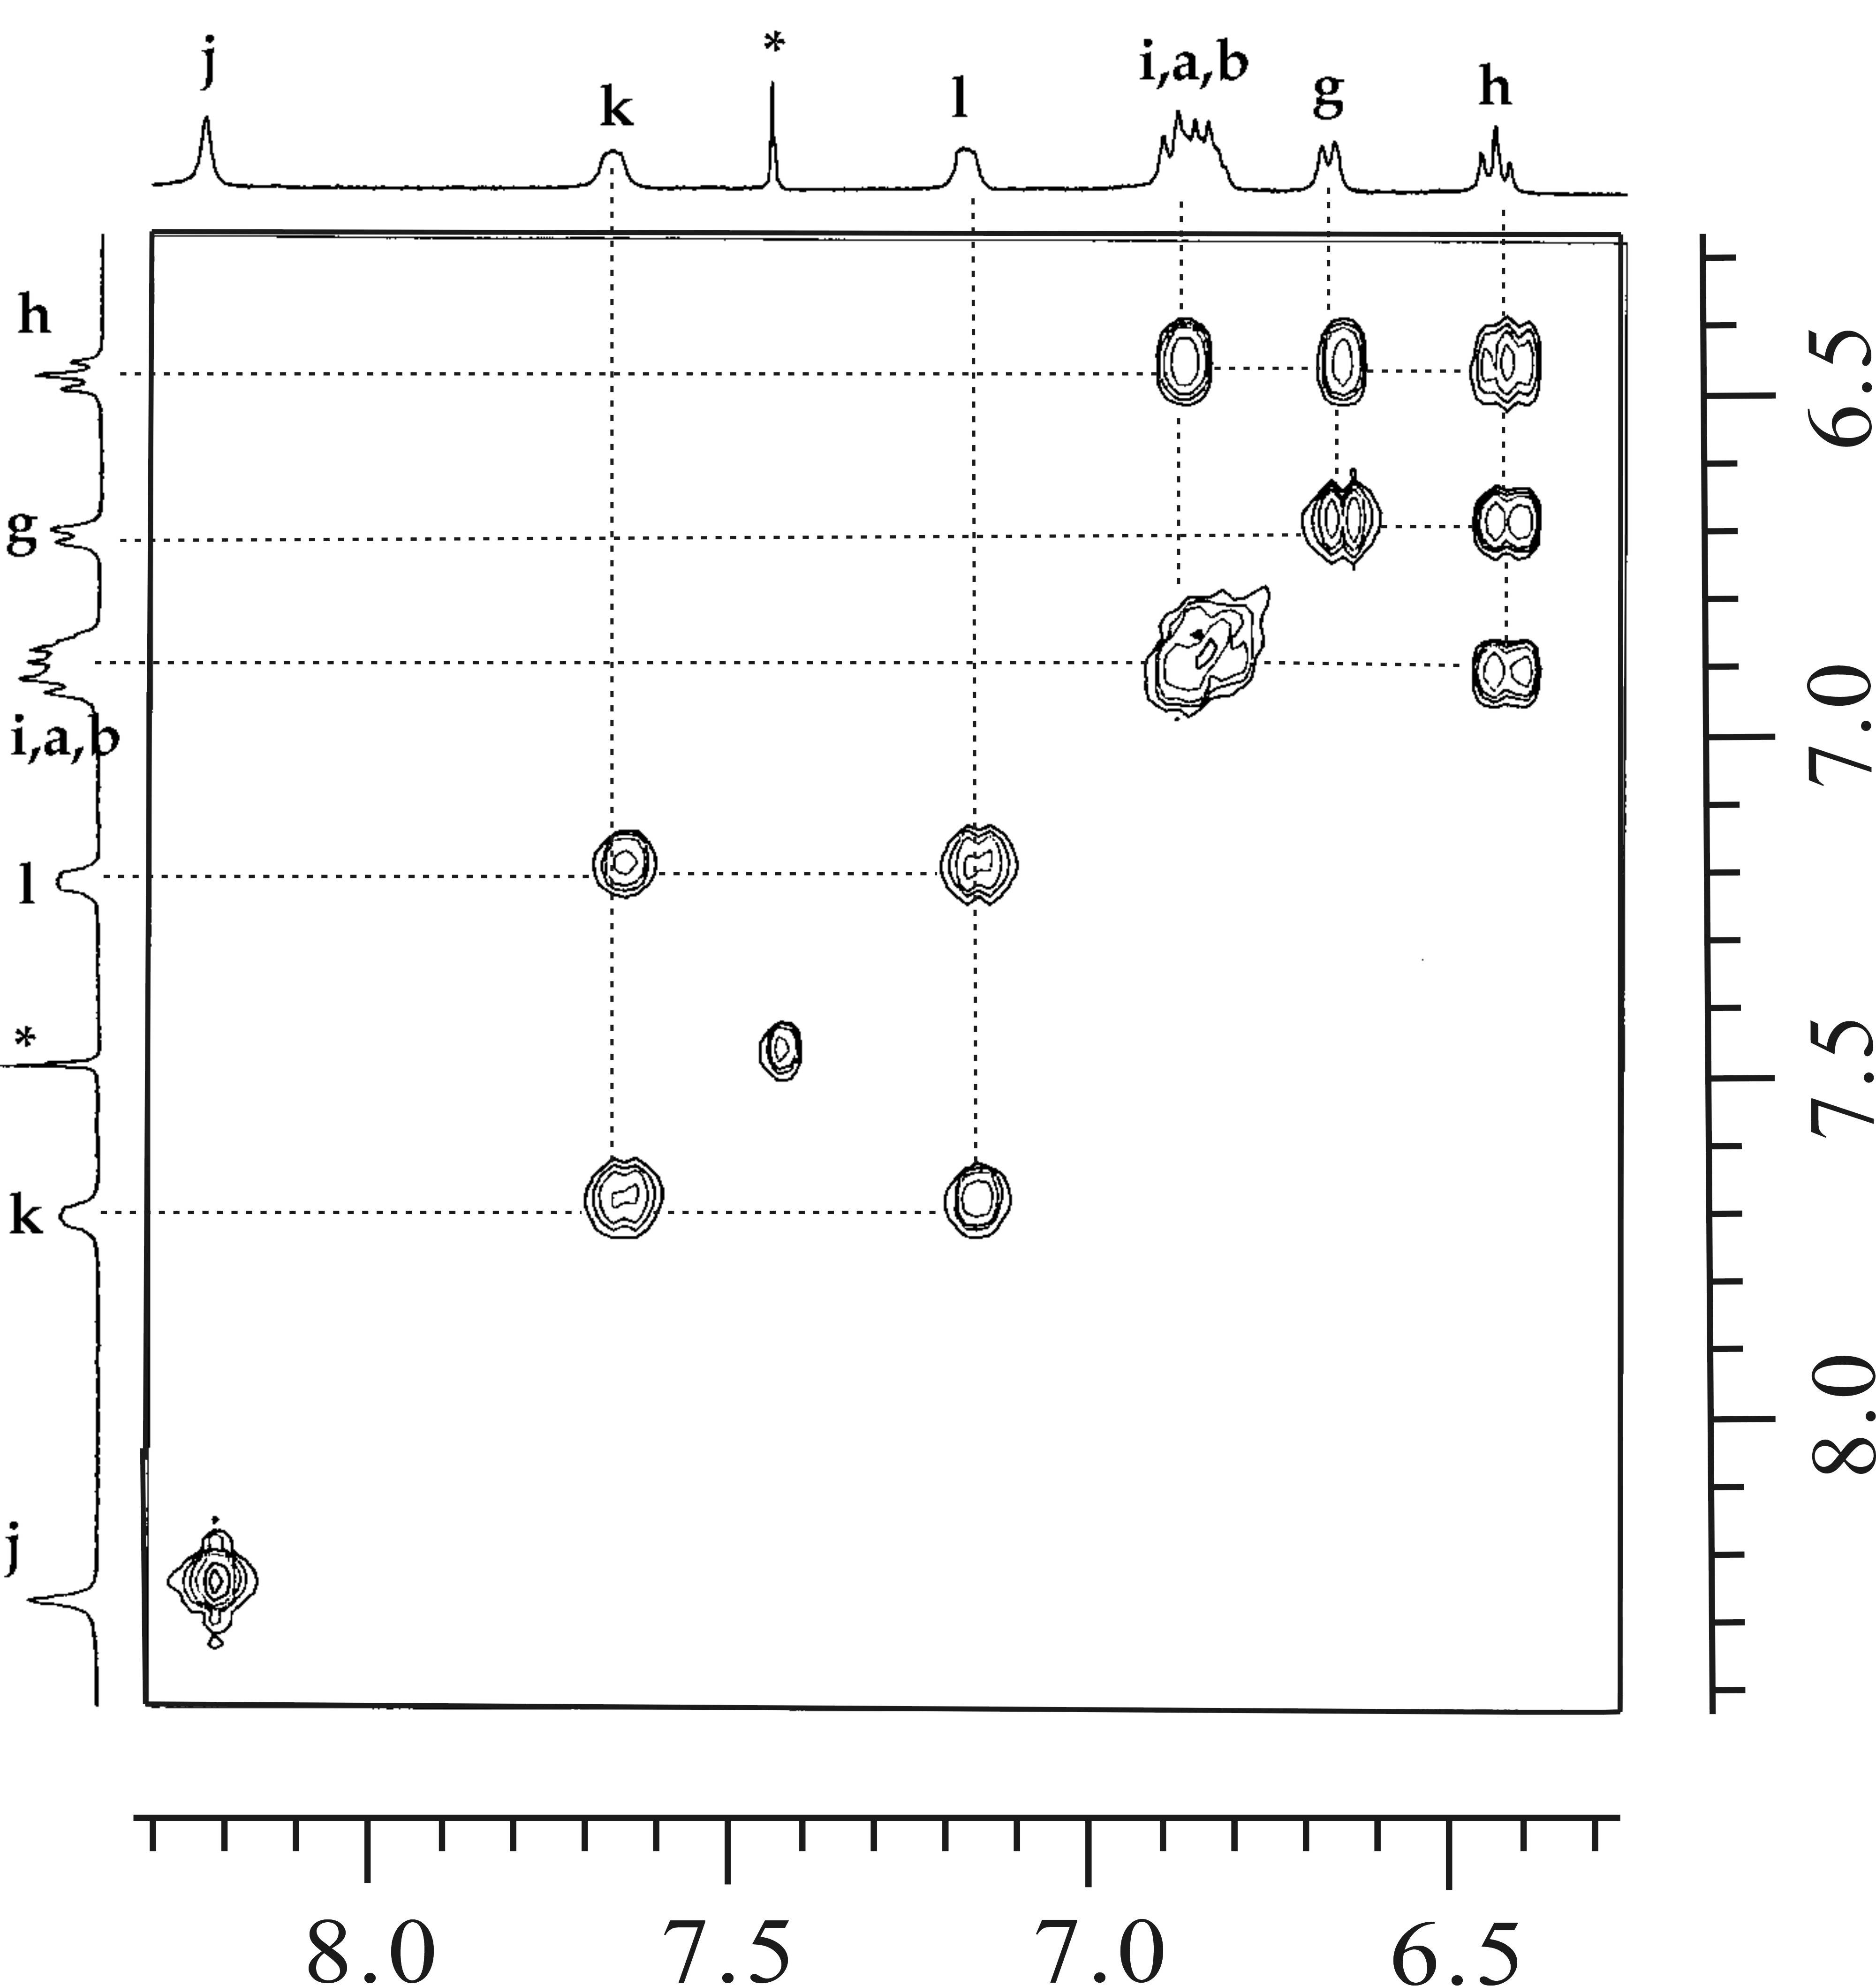


(b)

Fig. S2 Partial COSY-NMR Spectra (400 MHz, CDCl3/CD3CN=2:1) of (a) **2** and (b) **3**. The signal labeled with an asterisk represents CHCl3.


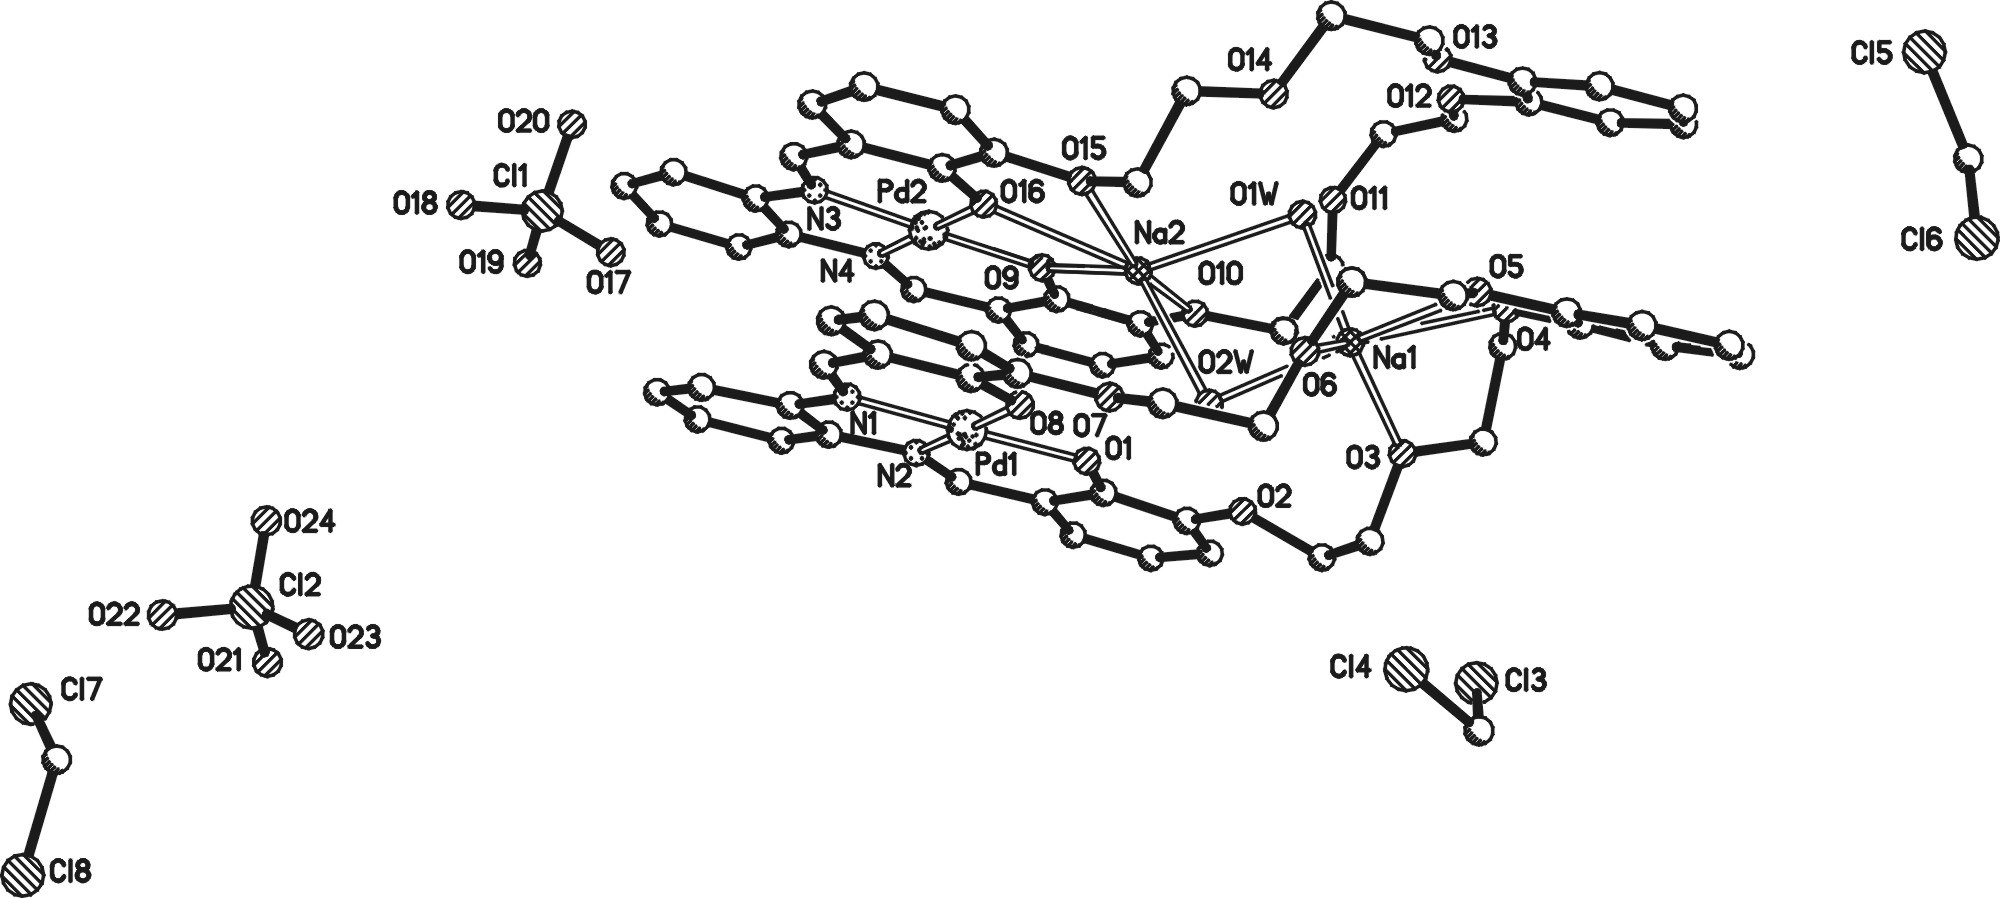


(a)


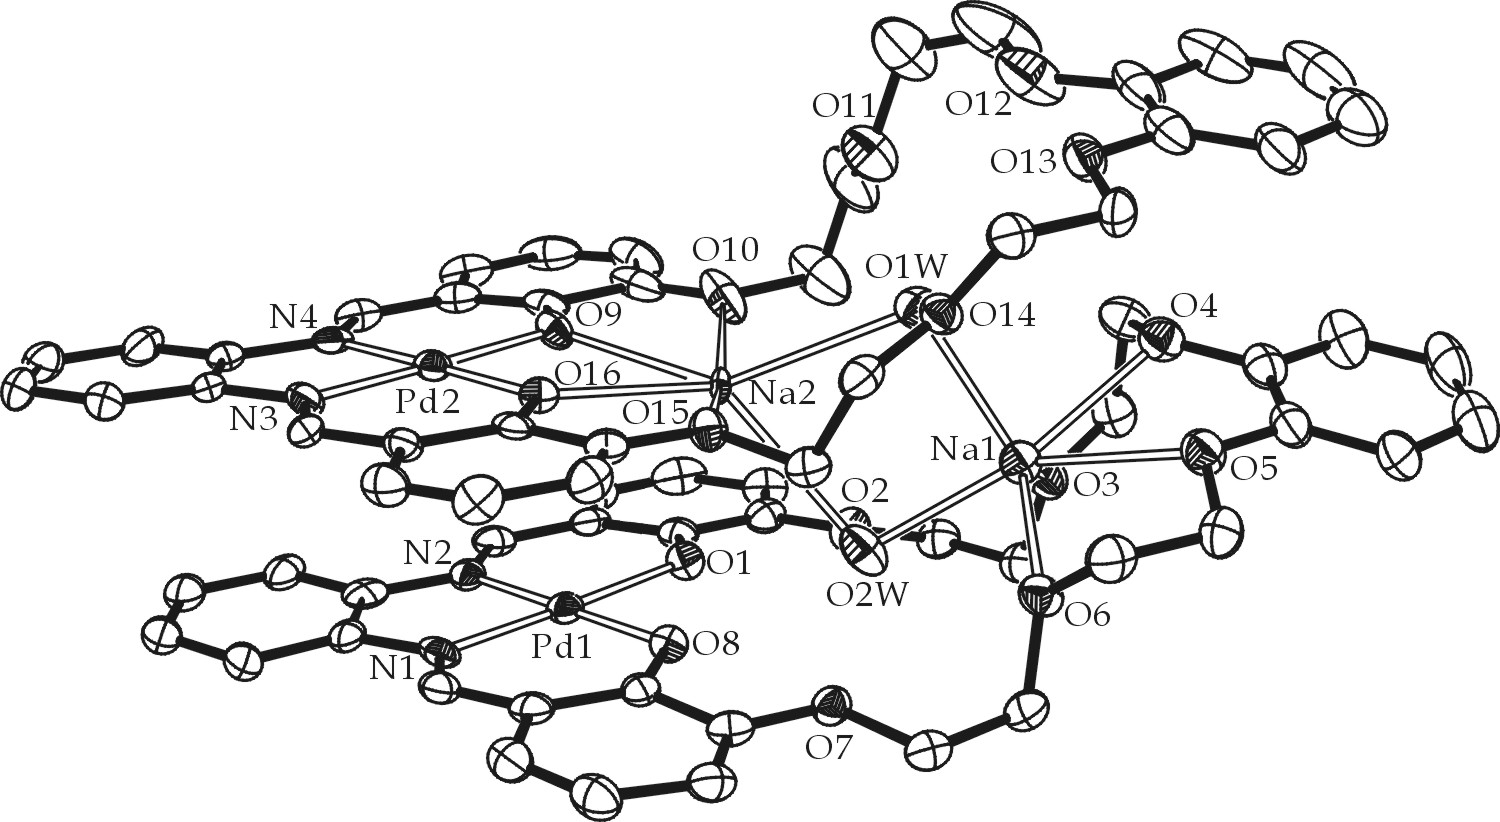


(b)

Fig. S3 Molecular structures of **2**: (a) asymmetric unit and (b) emphasised view of the coordination sites. Ellipsoids are drawn at the 30 % probability level. Hydrogen atoms are not shown for clarity. Selected bond lengths (Å) and angles (º): Pd(1)–N(1) 1.958(7), Pd(1)–N(2) 1.966(7), Pd(1)–O(8) 1.991(5), Pd(1)–O(1) 2.000(5), Pd(2)–N(3) 1.952(7), Pd(2)–N(4) 1.958(7), Pd(2)–O(9) 1.975(5), Pd(2)–O(16) 1.984(5), Na(1)–O(3) 2.366(6), Na(1)–O(4) 2.542(7), Na(1)–O(5) 2.569(7), Na(1)–O(6) 2.381(7), Na(1)–O(1W) 2.376(7), Na(1)–O(2W) 2.325(7), Na(2)–O(9) 2.596(6), Na(2)–O(10) 2.759(8), Na(2)–O(15) 2.758(6), Na(2)–O(16) 2.593(6), Na(2)–O(1W) 2.758(7), Na(2)–O(2W) 2.799(8); N(1)–Pd(1)–N(2) 84.1(3), O(8)–Pd(1)–O(1) 86.1(2), N(3)–Pd(2)–N(4) 84.1(3), O(9)–Pd(2)–O(16) 84.9(2), O(2W)–Na(1)–O(1W) 88.4(3), O(3)–Na(1)–O(6) 129.7(3), O(4)–Na(1)–O(5) 60.9(2), O(16)–Na(2)–O(9) 62.0(2), O(15)–Na(2)–O(10) 165.3(2), O(1W)–Na(2)–O(2W) 72.3(2), Na(1)–O(1W)–Na(2) 99.5(2), Na(1)–O(2W)–Na(2) 99.6(3).


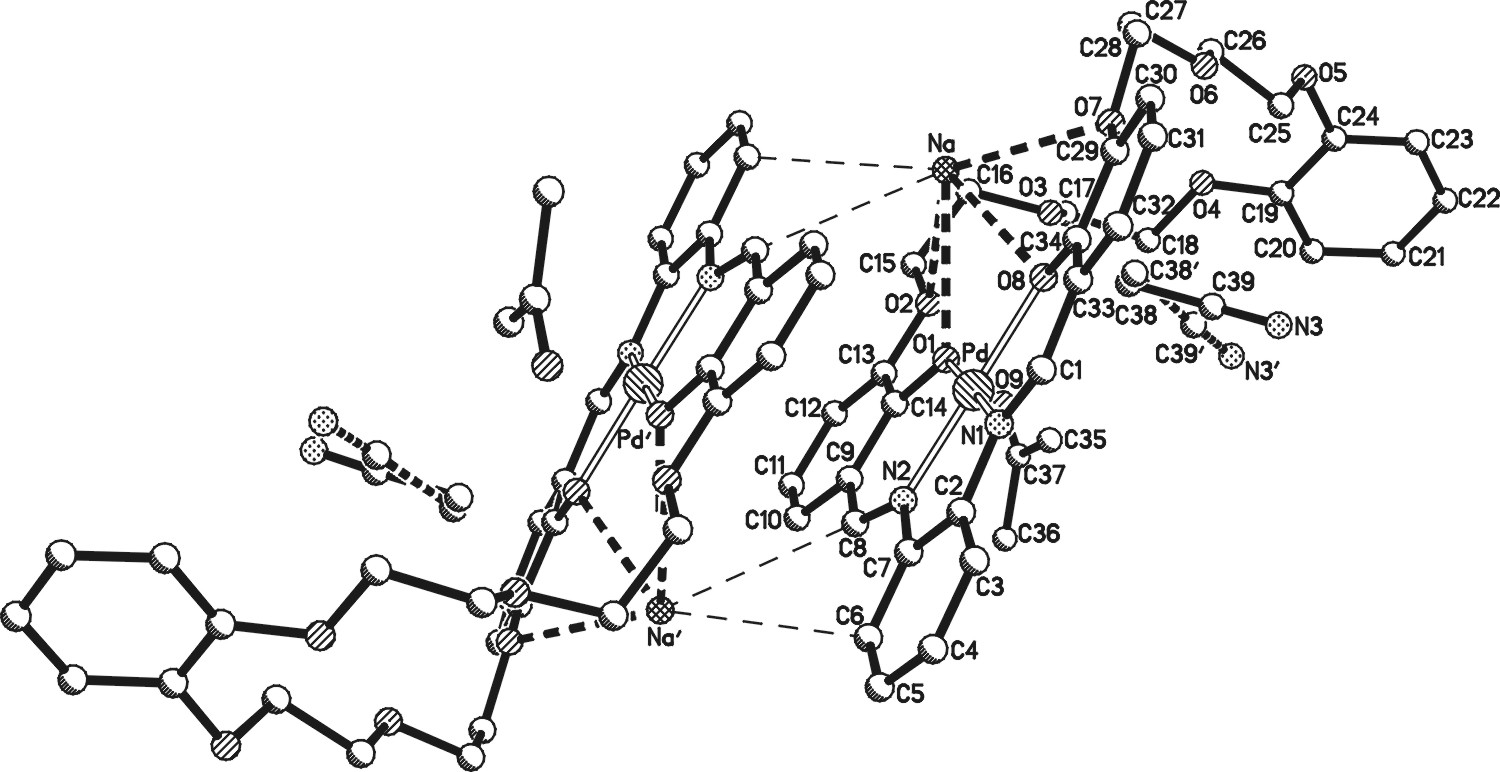


(a)


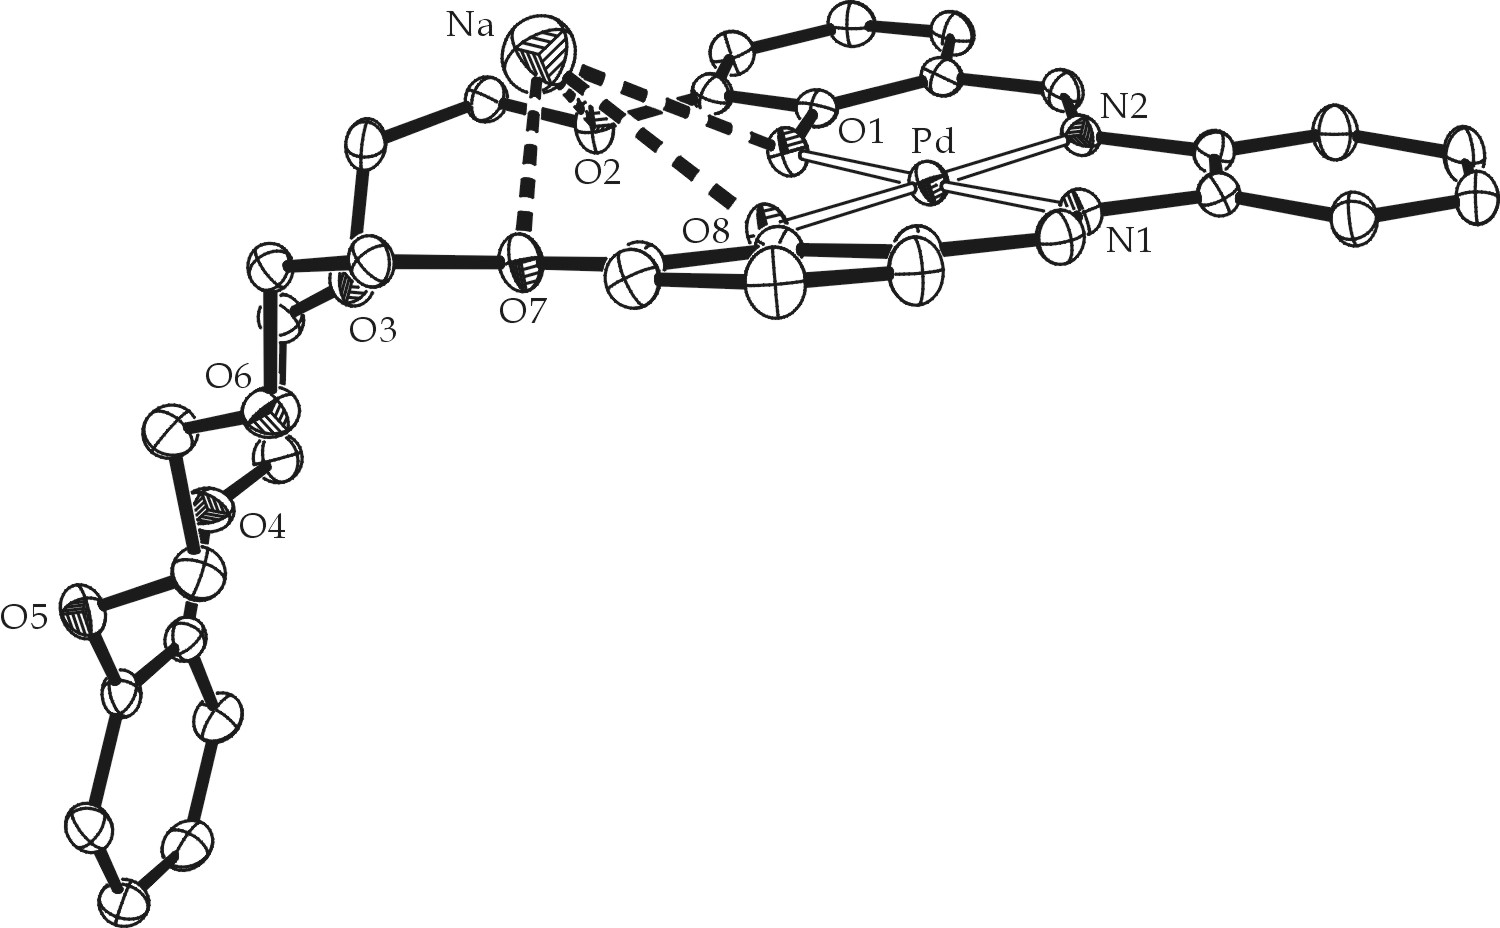


(b)

Fig. S4 The molecular structure of **3**: (a) dimeric structure in packing and (b) asymmetric unit. Ellipsoids are drawn at the 30 % probability level. Hydrogen atoms are not shown for clarity. Acetonitrile solvents are disordered (73.4:26.6) with C38–C39–N3 and C38'–C39'–N3' units occupying two positions. Selected bond lengths (Å) and angles (º): Pd–N(1) 1.958(2), Pd–N(2) 1.960(2), Pd–O(1) 1.989(2), Pd–O(8) 1.988(2), Na∙∙∙O(1) 2.943(2), Na∙∙∙O(2) 3.103(3), Na∙∙∙O(7) 3.077(3), Na∙∙∙O(8) 3.005(3), Na∙∙∙C(6') 3.515(3), Na∙∙∙C(8') 3.319(3); N(2)–Pd–N(1) 83.67(8), O(8)–Pd–O(1) 86.26(6), O(1)–Na–O(8) 54.38(5), O(2)–Na–O(7) 128.30(8) [symmetry operation: – *x*, 2 – *y*, 1 – *z*].


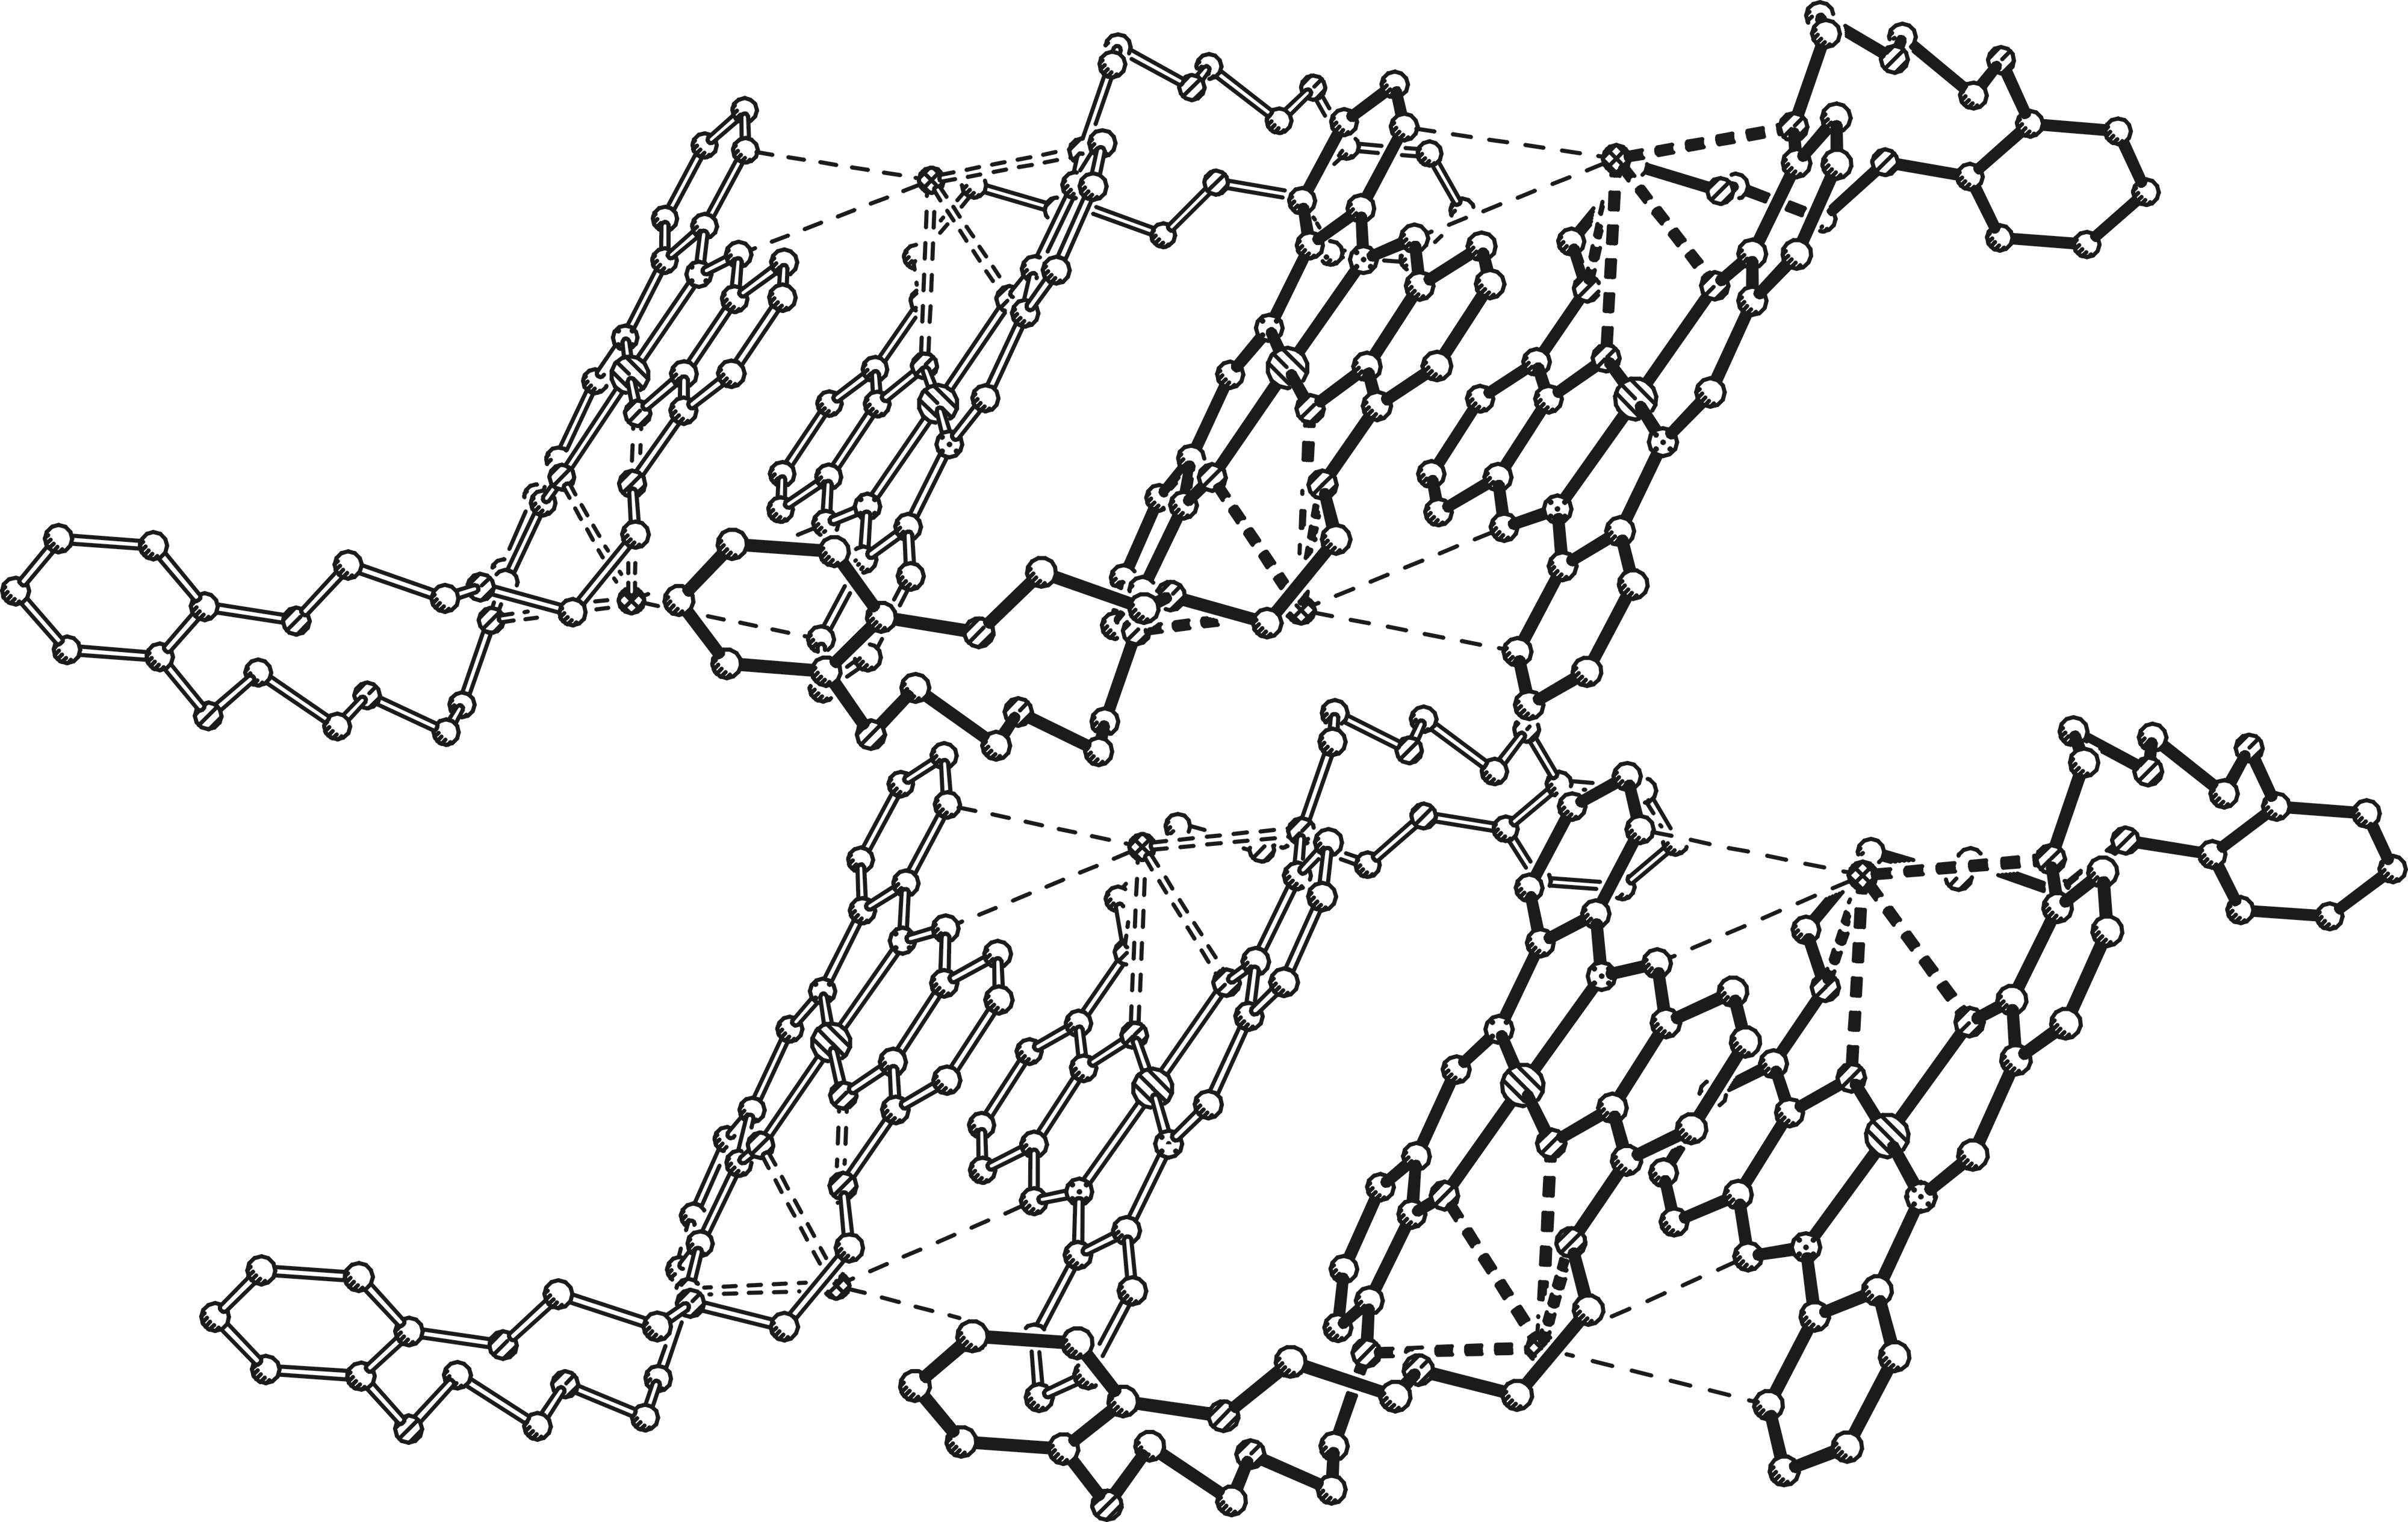


Fig. S5 Packing structure of **3**. Solvent molecules and hydrogen atoms are not shown for clarity.


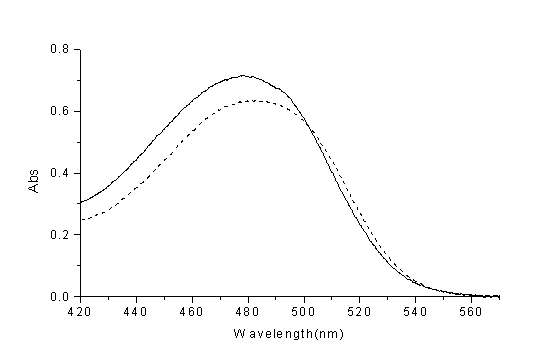


Fig. S6 Comparison of UV-visible spectra of **2** (solid line) and **3** (dashed line) in MeCN.
